# Supplementary material for: Exploring the relationships between Electron Spin Resonance (ESR)/Optically Stimulated Luminescence (OSL) properties and trace element composition in various quartz-bearing bedrocks (Strengbach catchment, Vosges)
Source: Copernicus journal article supplement (doi:10.5194/egusphere-2025-182), 2025-02-19

## Responses figures for RC#2

Figure #1

Chauhan et al., 2019 showed a linear correlation up to high regenerated dose (i.e 95 Gy),

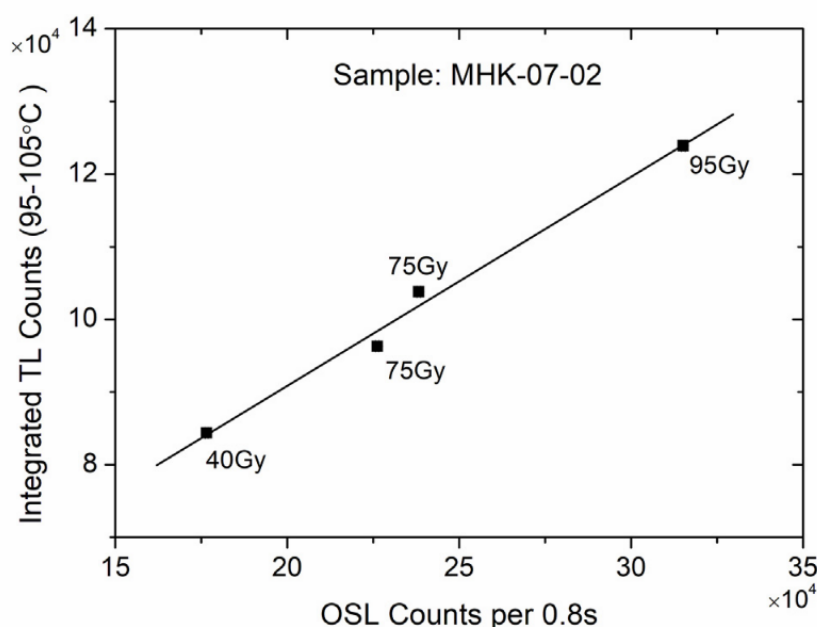

**Fig. 1.** Figure shows the correlation of TL and OSL signals from a single grain.

Figure #2

Plot box of the same color are results from the same sample. Plot box and sample names in black are the results from LA-ICP-MS analyses on whole rock thin sections. Plot box and sample names in grey are the results from LA-ICP-MS analyses on treated quartz grains mounted in resin.

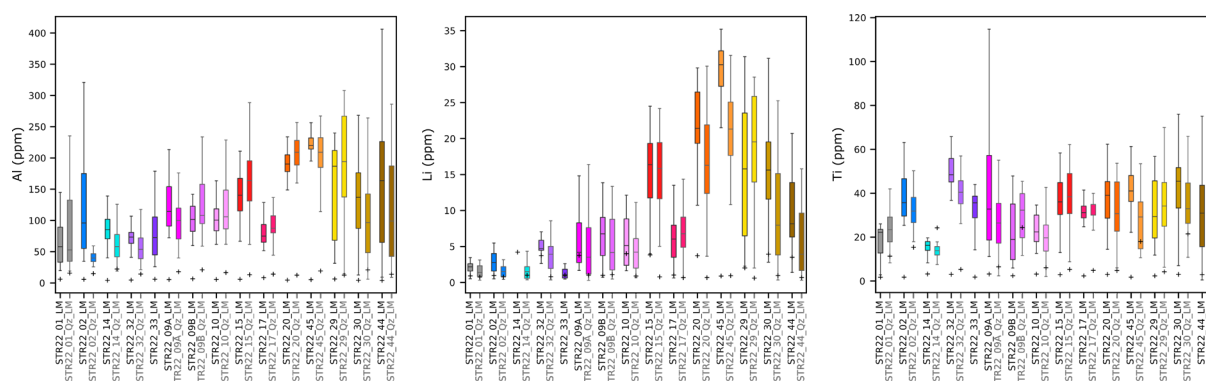

Supplement: Supplementary file [file egusphere-2025-182-AC2-supplement.pdf]
